# Supplementary figures and images for: Cystatin C in a composite risk score for mortality in patients with infective endocarditis: a cohort study
Source: HighWire-hosted journal article supplement (doi:10.1136/bmjopen-2012-000856), 2012-01-01

Supplementary Fig. 1 Bjurman et al.

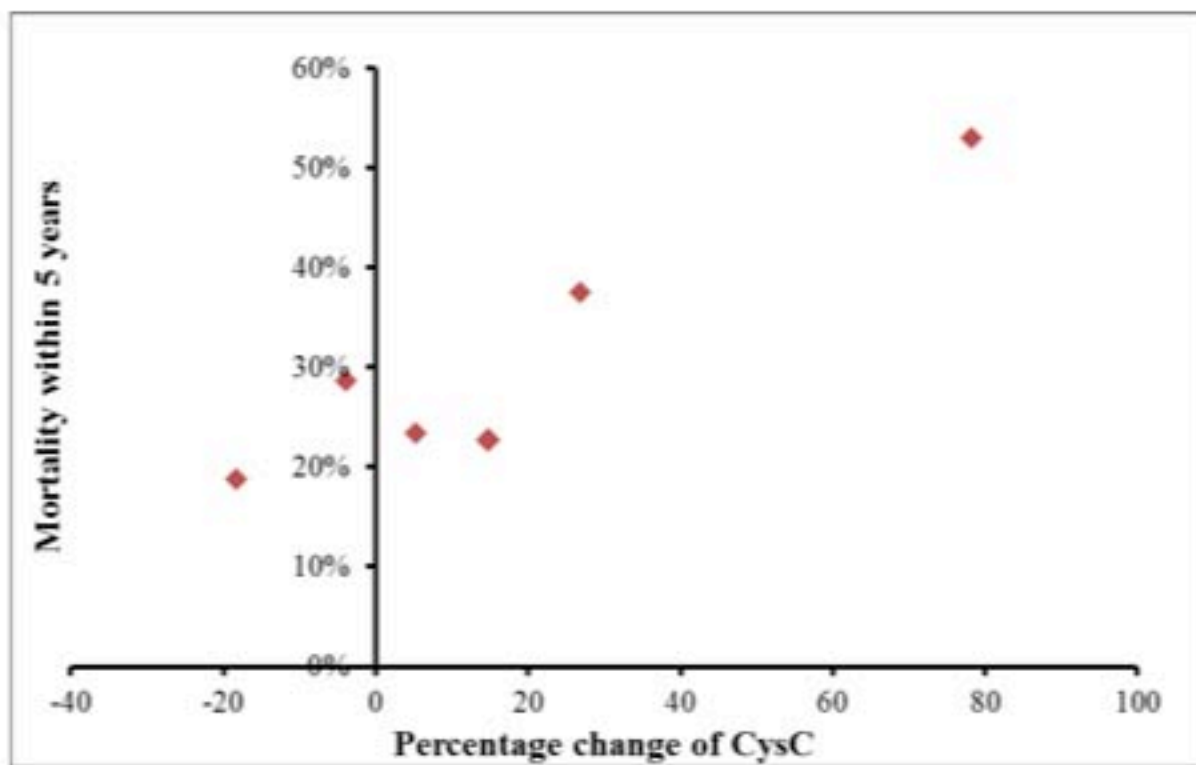

Supplement: bmjopen-2012-000856-s1.pdf [file bmjopen-2012-000856-s1.pdf]
